# Supplementary material for: Public health impacts of an imminent Red Sea oil spill
Source: PubMed Central journal article supplement (PMC8682806; doi:10.1038/s41893-021-00774-8), 2021-10-11
Supplement: NIHMS1758071-supplement-Supplementary_Materials.pdf [file NIHMS1758071-supplement-Supplementary_Materials.pdf]

---

**Supplementary information**

---

**Public health impacts of an imminent Red Sea oil spill**

---

In the format provided by the authors and unedited

## **Supplementary Information: Public health impacts of an imminent Red Sea oil spill**

Benjamin Q Huynh<sup>1</sup>, Laura H Kwong<sup>2</sup>, Mathew V Kiang<sup>3,4</sup>, Elizabeth T Chin<sup>1</sup>, Amir M Mohareb<sup>5,6</sup>, Aisha O Jumaan<sup>7</sup>, Sanjay Basu<sup>8,9,10</sup>, Pascal Geldsetzer<sup>11,12</sup>, Fatima M Karaki<sup>13</sup>, David H Rehkopf<sup>3</sup>

1 Department of Biomedical Data Science, Stanford University School of Medicine, Stanford, CA, USA

2 Division of Environmental Health Sciences, School of Public Health, University of California, Berkeley, CA, USA

3 Department of Epidemiology and Population Health, Stanford University School of Medicine, Stanford, CA, USA

4 Harvard FXB Center for Health and Human Rights, Harvard University, Boston, MA, USA

5 Division of Infectious Diseases, Massachusetts General Hospital, Boston, MA, USA

6 Department of Medicine, Harvard Medical School, Boston, MA, USA

7 Yemen Relief and Reconstruction Foundation, Mercer Island, WA, USA

8 Center for Primary Care, Harvard Medical School, Boston, MA, USA

9 School of Public Health, Imperial College, London, UK

10 Institute of Health Policy, Management & Evaluation, University of Toronto, Toronto, ON

11 Division of Primary Care and Population Health, Department of Medicine, Stanford University School of Medicine, Stanford, CA, USA

12 Heidelberg Institute of Global Health, Heidelberg University, Heidelberg, Germany

13 Refugee and Asylum seeker Health Initiative, Department of Medicine, University of California San Francisco, San Francisco, CA, USA

\*Contributed equally.

Correspondence: [benhuynh@stanford.edu](mailto:benhuynh@stanford.edu)

## **Supplementary Analyses**

Here we present additional sub-analyses showing how our estimates change when varying certain input parameters. Supplementary Figures 1, 2, 3, 4, and 5 are qualitatively similar to Figure 1, showing that varying spill duration (from 7 days to 24 hours), season (from winter and summer to autumn and spring), spatial resolution of spill particles (from 3 rounded decimal points of a longitude-latitude grid to 2), and number of spill particles (from 1000 to 10,000) do not substantially change our results in terms of simulated spills.

Supplementary Table 3 shows how varying the threshold of oil exposure moderately varies the amount of fisheries threatened by the oil spill. Supplementary Tables 4 shows increased hospitalization risk from air pollution using a different risk factor calculation, and Supplementary Table 5 shows increased mortality risk from air pollution.

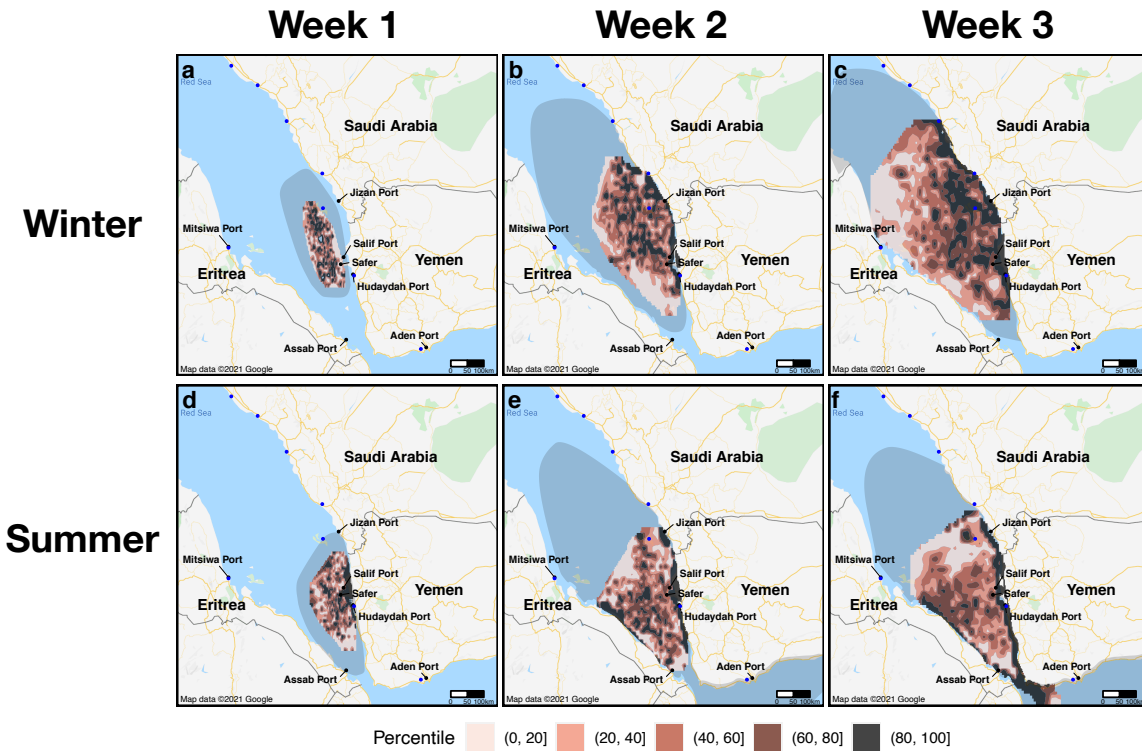

Supplementary Figure 1: Average surface oil concentration of 1000 simulated spills in the winter (a,b,c) and 1000 spills in the summer (d,e,f), assuming a 24-hour spill duration. Columns denote progress of the 1000 spills after one week (a,d), two weeks (b,e), and three weeks (c,f). Colored contours represent percentiles of average surface concentration over 1000 simulated spills. Shaded region represents the area within which approximately 90% of spill trajectories are expected to fall. Blue dots represent desalination plants.

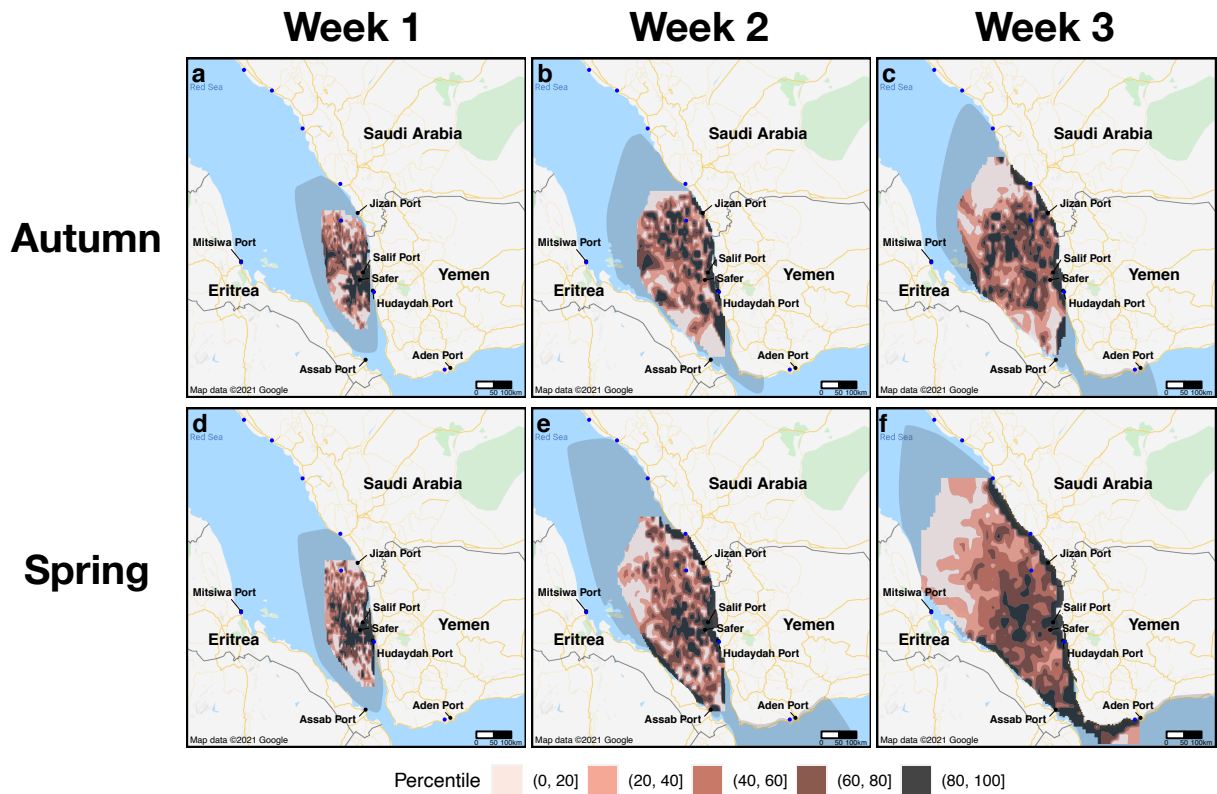

Supplementary Figure 2: Average surface oil concentration of 1000 simulated spills in the autumn (a,b,c) and 1000 spills in the spring (d,e,f). Columns denote progress of the 1000 spills after one week (a,d), two weeks (b,e), and three weeks (c,f). Colored contours represent percentiles of average surface concentration over 1000 simulated spills. Shaded region represents the area within which approximately 90% of spill trajectories are expected to fall. Blue dots represent desalination plants.

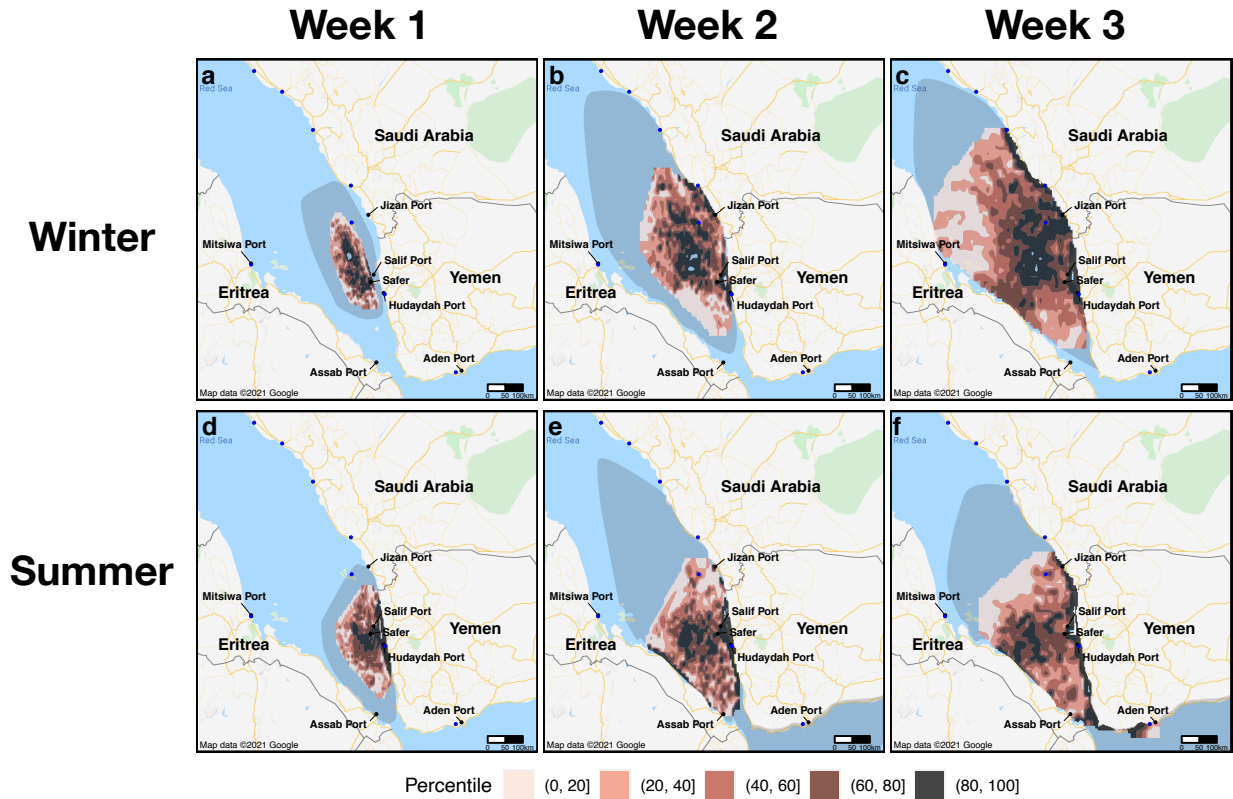

Supplementary Figure 3: Average surface oil concentration of 1000 simulated spills in the winter (a,b,c) and 1000 spills in the summer (d,e,f), with the spatial resolution rounded to two decimal points instead of three. Columns denote progress of the 1000 spills after data one week (a,d), two weeks (b,e), and three weeks (c,f). Colored contours represent percentiles of average surface concentration over 1000 simulated spills. Shaded region represents the area within which approximately 90% of spill trajectories are expected to fall. Blue dots represent desalination plants.

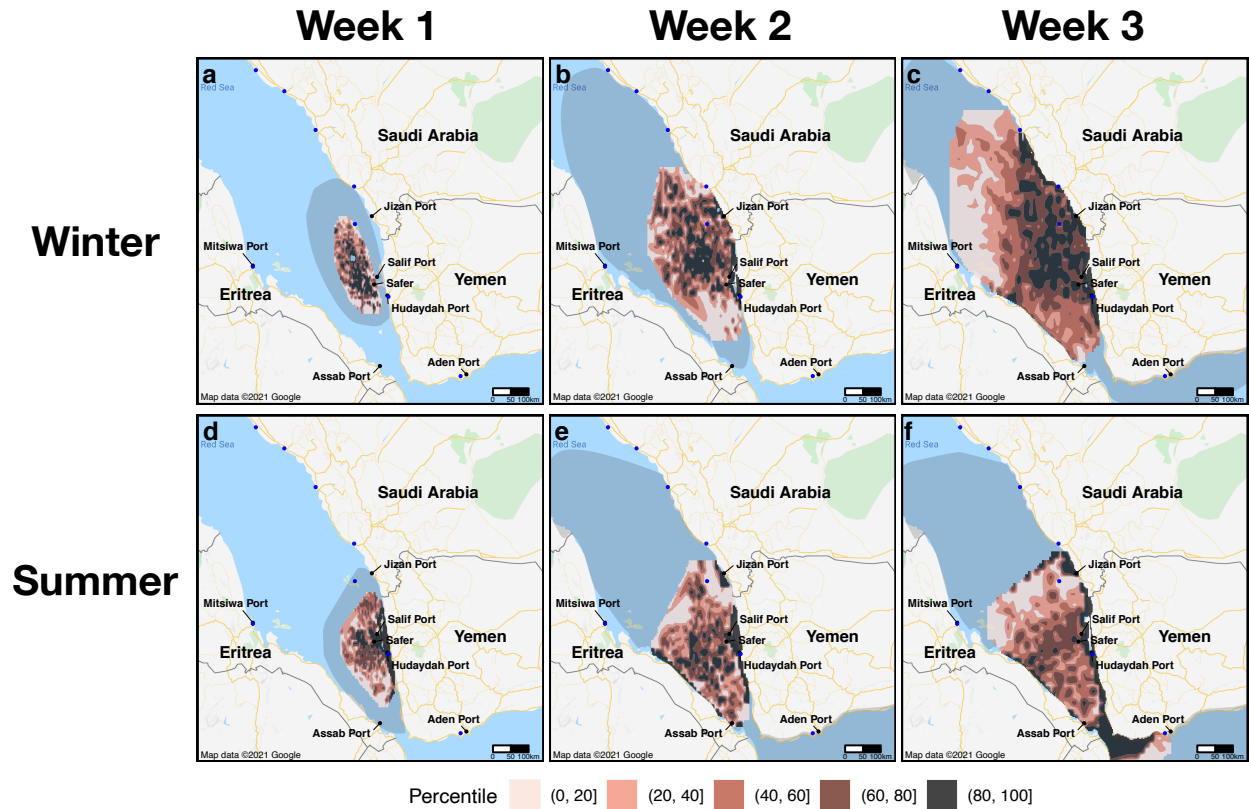

Supplementary Figure 4: Average surface oil concentration of 1000 simulated spills in the winter (a,b,c) and 1000 spills in the summer (d,e,f), with 10,000 particles per spill instead of 1000. Columns denote progress of the 1000 spills after one week (a,d), two weeks (b,e), and three weeks (c,f). Colored contours represent percentiles of average surface concentration over 1000 simulated spills. Shaded region represents the area within which approximately 90% of spill trajectories are expected to fall. Blue dots represent desalination plants.

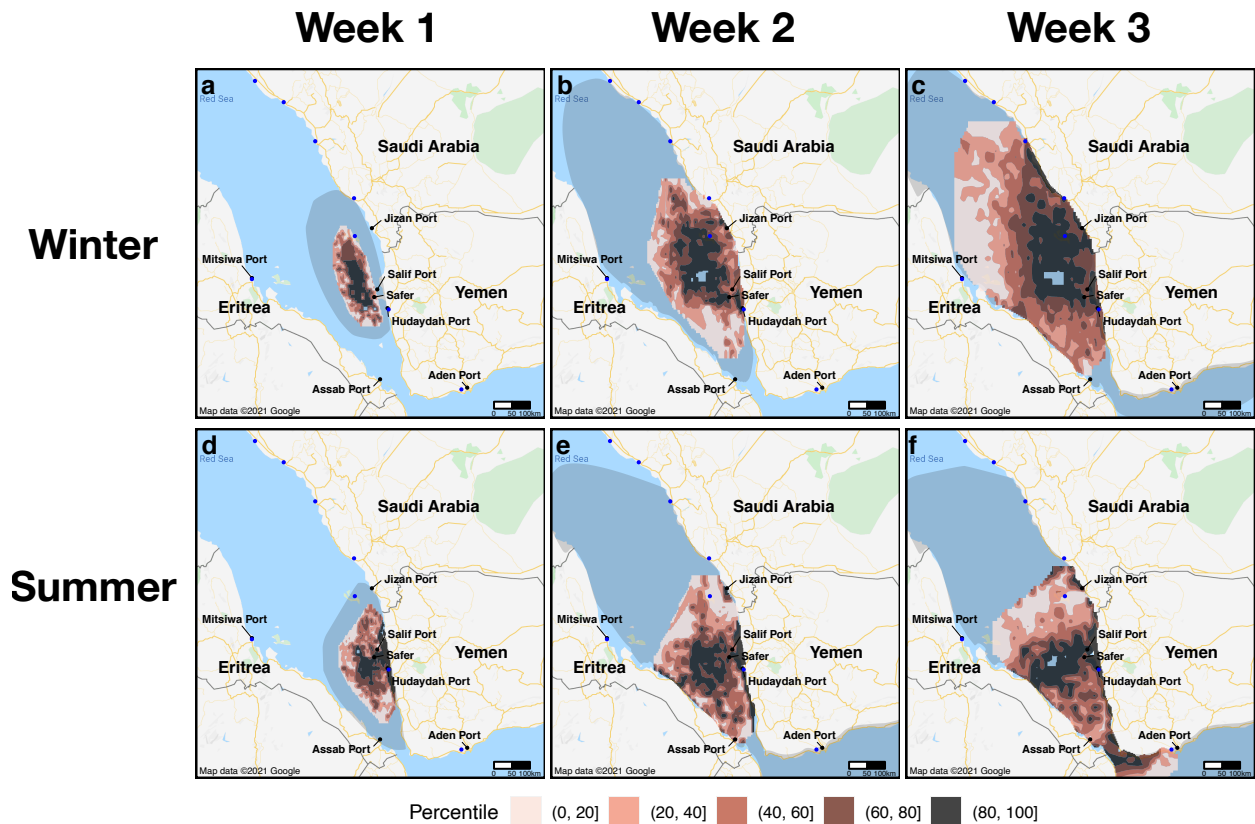

Supplementary Figure 5: Average surface oil concentration of 1000 simulated spills in the winter (a,b,c) and 1000 spills in the summer (d,e,f), with the spatial resolution rounded to two decimal points and 10,000 particles per spill. Columns denote progress of the 1000 spills after one week (a,d), two weeks (b,e), and three weeks (c,f). Colored contours represent percentiles of average surface concentration over 1000 simulated spills. Shaded region represents the area within which approximately 90% of spill trajectories are expected to fall. Blue dots represent desalination plants.



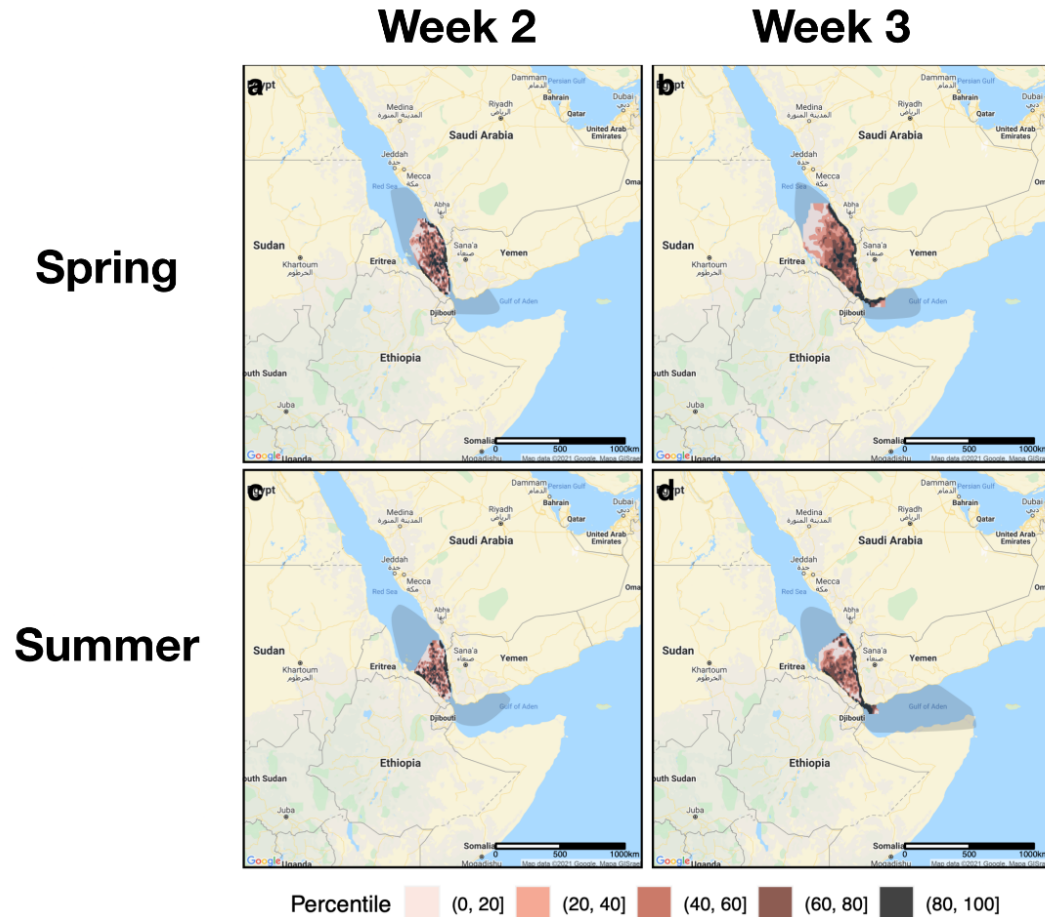

Supplementary Figure 6: Zoomed out view of oil spill simulations for Spring (a,b) and Summer (c,d) in weeks 2 (a,c) and 3 (b,d). Colored contours represent percentiles of average surface concentration over 1000 simulations. Shaded region represents the area within which approximately 90% of spill trajectories are expected to fall, which is now visible for the Gulf of Aden.

### Tables

Supplementary Table 1: Percentiles of oil surface concentration amongst exposed areas averaged over simulations at locations of interest.

| Location | Significance | Country | Week 1 Summer | Week 2 Summer | Week 3 Summer | Week 1 Winter | Week 2 Winter | Week 3 Winter |
|----------|--------------|---------|---------------|---------------|---------------|---------------|---------------|---------------|
| Hudaydah | Port         | Yemen   | 94            | 96            | 94            | 0             | 98            | 97            |
| Salif    | Port         | Yemen   | 84            | 90            | 88            | 0             | 91            | 94            |
| Aden     | Port         | Yemen   | 0             | 0             | 26            | 0             | 0             | 0             |
| Hudaydah | Desalination | Yemen   | 94            | 96            | 94            | 0             | 98            | 97            |

|          |              |              |   |    |    |   |    |    |
|----------|--------------|--------------|---|----|----|---|----|----|
| Aden     | Desalination | Yemen        | 0 | 0  | 26 | 0 | 0  | 0  |
| Assab    | Port         | Eritrea      | 0 | 23 | 24 | 0 | 0  | 0  |
| Jizan    | Port         | Saudi Arabia | 0 | 83 | 87 | 0 | 95 | 99 |
| Farasan  | Desalination | Saudi Arabia | 0 | 55 | 66 | 0 | 65 | 70 |
| Shuqaiq  | Desalination | Saudi Arabia | 0 | 0  | 0  | 0 | 0  | 95 |
| Qunfudah | Desalination | Saudi Arabia | 0 | 0  | 0  | 0 | 0  | 85 |

Supplementary Table 2: Locations and capacities of known desalination plants in the Southern Red Sea.

| Desalination plant | Country      | Coordinates          | Capacity (m <sup>3</sup> /day) |
|--------------------|--------------|----------------------|--------------------------------|
| Hirgigo            | Eritrea      | 15.580140, 39.449509 | 2,000                          |
| Farasan            | Saudi Arabia | 16.687464, 42.096350 | 9,000                          |
| Shuqaiq 1          | Saudi Arabia | 17.6599, 42.0761     | 94,000                         |
| Shuqaiq 2          | Saudi Arabia | 17.6599, 42.0761     | 216,000                        |
| Shuaiba            | Saudi Arabia | 20.675714, 39.528004 | 1,707,540                      |
| Qunfudah           | Saudi Arabia | 19.125537, 41.078224 | 9,000                          |
| Al Lith            | Saudi Arabia | 20.130047, 40.266668 | 9,000                          |
| Jeddah             | Saudi Arabia | 21.480555, 39.177983 | 663,532                        |
| Aden               | Yemen        | 12.745462, 44.836638 | 34,000 (estimated)             |
| Hudaydah           | Yemen        | 14.800858, 42.966017 | 34,000 (estimated)             |

Supplementary Table 3: Estimated percent of total fish yield loss for Yemen in the Red Sea region by week after spill and season of spill. Different levels of oil exposure, measured in terms of percentiles of surface concentration relative to other exposed areas, are selected as minimum values to cause fish yield loss.

|                         | Week 1 | Week 2 | Week 3 |
|-------------------------|--------|--------|--------|
| Winter, no threshold    | 74.6   | 87.86  | 97.96  |
| Summer, no threshold    | 90.02  | 100    | 100    |
| Winter, 10th percentile | 66.47  | 87.86  | 92.96  |
| Summer, 10th percentile | 85.2   | 97.96  | 100    |
| Winter, 20th percentile | 64.34  | 80.03  | 92.96  |
| Summer, 20th percentile | 77.62  | 95.47  | 100    |

Supplementary table 4: Population-weighted average increased risk and exposed populations for respiratory hospitalizations from air pollution over various scenarios and spill durations. Spill duration is equivalent to exposure duration. All intervals denote 95% confidence intervals. Exposed population is defined as having been exposed to 10 ug/m<sup>3</sup> or more of PM<sub>2.5</sub>. Uses estimates from Wei et al.<sup>1</sup>

| Scenario                   | Average IR (%)         | Affected population (person-days) |
|----------------------------|------------------------|-----------------------------------|
| Summer, Fast-release, Leak | 53.18<br>(50.4,55.96)  | 10968475                          |
| Winter, Fast-release, Leak | 27.51<br>(26.15,28.87) | 3117855                           |
| Summer, Slow-release, Leak | 23.89<br>(22.73,25.05) | 9190836                           |
| Winter, Slow-release, Leak | 10.37<br>(9.89,10.85)  | 2318394                           |
| Summer, Fast-release, Fire | 73.05<br>(69.56,76.54) | 13247822                          |
| Winter, Fast-release, Fire | 33.61<br>(32.07,35.14) | 4256849                           |
| Summer, Slow-release, Fire | 29.9<br>(28.51,31.29)  | 11761566                          |

|                            |                       |         |
|----------------------------|-----------------------|---------|
| Winter, Slow-release, Fire | 11.42<br>(10.9,11.93) | 4078233 |
|----------------------------|-----------------------|---------|

Supplementary table 5: Population-weighted average increased risk and exposed populations for cardiovascular and respiratory mortality from air pollution over various scenarios and spill durations. Spill duration is equivalent to exposure duration. All intervals denote 95% confidence intervals. Exposed population is defined as having been exposed to 10 ug/m<sup>3</sup> or more of PM<sub>2.5</sub>. Uses estimates from Kloog et al.<sup>2</sup>

| Scenario                   | Average IR (%)         | Affected population (person-days) |
|----------------------------|------------------------|-----------------------------------|
| Summer, Fast-release, Leak | 26.73<br>(25.93,27.53) | 10845335                          |
| Winter, Fast-release, Leak | 13.55<br>(13.22,13.89) | 3163042                           |
| Summer, Slow-release, Leak | 11.75<br>(11.42,12.07) | 9347517                           |
| Winter, Slow-release, Leak | 5.04 (4.92,5.15)       | 2272926                           |
| Summer, Fast-release, Fire | 34.98<br>(34.11,35.85) | 13106374                          |
| Winter, Fast-release, Fire | 16.68<br>(16.33,17.04) | 4360401                           |
| Summer, Slow-release, Fire | 15.27<br>(14.91,15.63) | 11792403                          |
| Winter, Slow-release, Fire | 5.64 (5.53,5.75)       | 4066740                           |

Supplementary Table 6: Quantities reported in the main text in their rounded form and originally calculated form.

| Quantity of interest          | Reported estimate | Point estimate | 95% UI (Reported) | 95% UI (Calculated) |
|-------------------------------|-------------------|----------------|-------------------|---------------------|
| Oil evaporated after 24 hours | 51                | 50.6           | 46-54             | 46.0275-53.9825     |

|                                                               |           |           |                          |                          |
|---------------------------------------------------------------|-----------|-----------|--------------------------|--------------------------|
| Monthly fuel disruption                                       | 200,000   | 206,723   | 180,000-<br>250,000      | 184718.7-<br>254009.7    |
| Monthly food aid disruption (Hudaydah only)                   | 5,700,000 | 5,684,800 | 3,700,000-<br>8,100,000  | 3,695,800-<br>8,122,600  |
| Monthly food aid disruption (Aden included)                   | 8,400,000 | 8,360,000 | 5,400,000-<br>11,900,000 | 5,435,000-<br>11,945,000 |
| Increased risk of cardiovascular hospitalization at 1600ug/m3 | 530%      | 529%      | 460-590                  | 464.2608-<br>590.1955    |
